# Supplementary material
Source: publisher figshare collection journal article supplement (https://gsajournals.figshare.com/articles/dataset/_/14237849)
Supplement: Supplementary file 1 [file 1]

## Sheet: Table_S4
Table S4: Hematopoietic progenitors
Cell type	ID	Isolation/Sort markers	2015-03-10	2015-03-25	2015-03-31	2015-04-01	2015-04-07	2015-04-08	2015-04-22	2015-04-23	2015-05-27	2016-05-17	2016-05-19	2016-06-09	2016-08-12	2016-08-25	2016-09-21	2016-10-12	2017-02-08	2018-05-31	2018-06-06	2018-06-13	2018-06-19	2018-06-26	2018-06-27	2018-07-12	2018-07-25	2018-07-26	2018-08-22	2018-08-29	2018-08-30	2018-08-30	Totals	Comment
LSK	1295	CD4-, CD8-, IL7Ra-, CD11b-, Ly6g/c-, CD45R-, Ter119-, cKit+, Sca1+	0.79*	0.55	0.57	0.58	0.6	0.43	0.63	0.55	0.51																						4.42
LSK	1297	CD4-, CD8-, IL7Ra-, CD11b-, Ly6g/c-, CD45R-, Ter119-, cKit+, Sca1+										0.57	0.42	0.51	0.66	0.24	0.35	0.42	0.7					0.62	0.64								5.13
CMP	1976	CD4-, CD8-, IL7Ra-, CD11b-, Ly6g/c-, CD45R-, Ter119-, cKit+, Sca1-, CD34+, CD16/32-																					0.65	0.56	0.6	0.32	0.8	0.75	0.55	0.49	0.8	0.54	6.06
GMP	1977	CD4-, CD8-, IL7Ra-, CD11b-, Ly6g/c-, CD45R-, Ter119-, cKit+, Sca1-, CD34+, CD16/32+																					0.67	1.3	1.08	0.47	1.91						5.43
MEP	1978	CD4-, CD8-, IL7Ra-, CD11b-, Ly6g/c-, CD45R-, Ter119-, cKit+, Sca1-, CD34-, CD16/32-																					0.24	0.44	0.3	0.47	0.65	0.45	0.62	0.61	0.69	0.38	4.85
CFUE	1980	CD4-, CD8-, IL7Ra-, CD11b-, Ly6g/c-, CD45R-, Ter119+, CD44+, FSCHigh																				7.11											7.11
ERY	1909	CD4-, CD8-, IL7Ra-, CD11b-, Ly6g/c-, CD45R-, Ter119+, CD44+, FSCLow																				14.41											14.41	Approximately 1/2 of sonicated chromatin was used for CTCF ChIP
ERY	1926	CD4-, CD8-, IL7Ra-, CD11b-, Ly6g/c-, CD45R-, Ter119+, CD44+, FSCLow																			8.4												8.4
CFUMk	1979	CD4-, CD8-, IL7Ra-, CD11b-, Ly6g/c-, CD45R-, Ter119-, Sca1-, CD41+, CD61+, cKit+																		2.6	2	2.01											6.61
Mk	1908	CD4-, CD8-, IL7Ra-, CD11b-, Ly6g/c-, CD45R-, Ter119-, Sca1-, CD41+, CD61+, cKit-																			24												24	Approximately 1/4 of sonicated chromatin was used for CTCF ChIP
Mk	1910	CD4-, CD8-, IL7Ra-, CD11b-, Ly6g/c-, CD45R-, Ter119-, Sca1-, CD41+, CD61+, cKit-																		17.1													17.1	Approximately 1/3 of sonicated chromatin was used for CTCF ChIP
*All cell numbers are reported in Millions (M) of cells.
