# Supplementary material
Source: publisher figshare collection journal article supplement (https://gsajournals.figshare.com/articles/dataset/_/14237849)
Supplement: Supplementary file 3 [file 1]

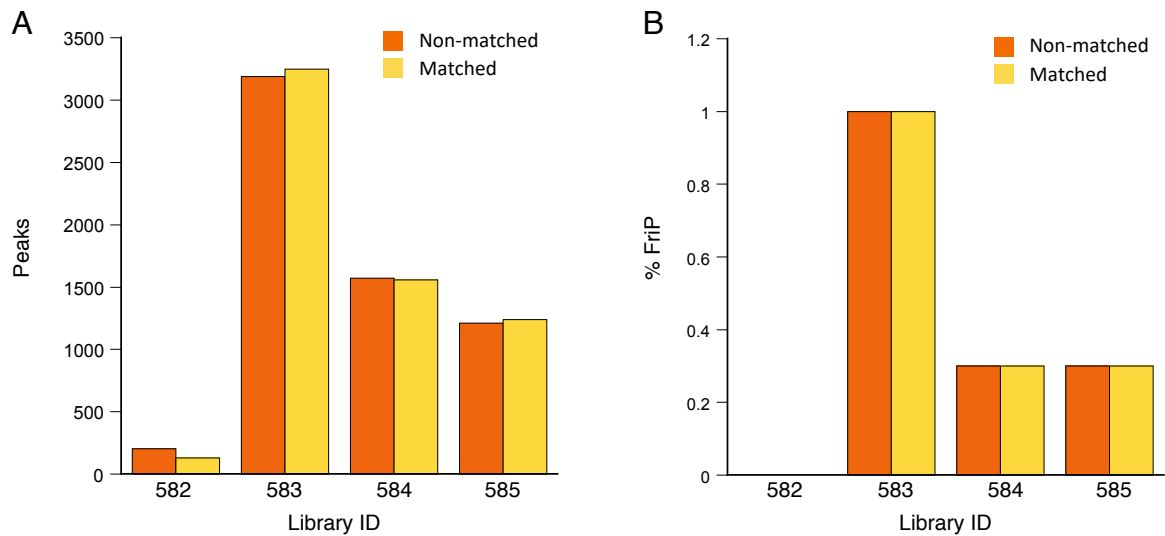

**Figure S3: Comparison of matched vs non-matched input control on the number of called peaks and FRiP scores in four retrospective TAL1 datasets. A) Peaks. B) FRiP (as percentage).** Non-matched input = orange, matched input = yellow
