# Supplementary material
Source: publisher figshare collection journal article supplement (https://gsajournals.figshare.com/articles/dataset/_/14237849)
Supplement: Supplementary file 4 [file 1]

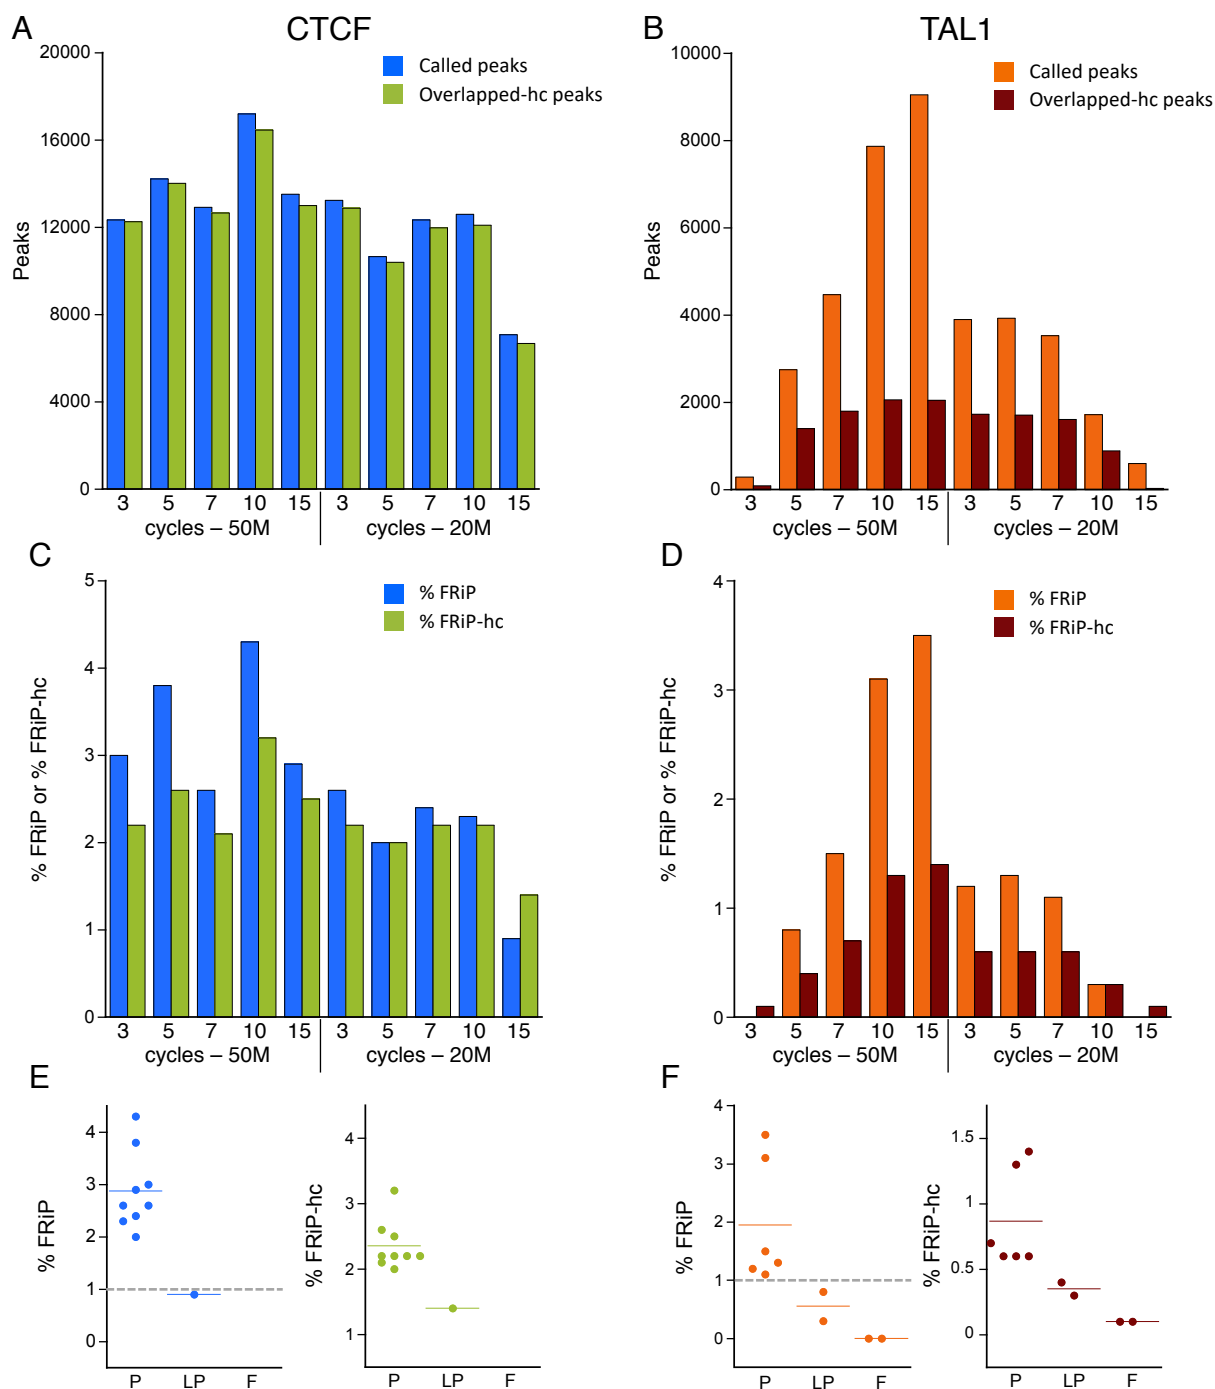

**Figure S2: Comparison of called peaks and % FRiP with overlapped-hc peaks and % FRiP-hc, respectively, for CTCF and TAL1.** **A)** Comparison of called peaks with overlapped-hc peaks for CTCF datasets. **B)** Comparison of called peaks with overlapped-hc peaks for TAL1 datasets. **C)** Comparison of FRiP with FRiP-hc shown as percentages for CTCF datasets. **D)** Comparison of FRiP with FRiP-hc shown as percentages for TAL1 datasets. **E)** FRiP and FRiP-hc shown as percentages classified by subjective assessment for CTCF. **F)** FRiP and FRiP-hc shown as percentages classified by subjective assessment for TAL1. blue = CTCF peaks or FRiP as percentage (as indicated), green = CTCF overlapped-hc peaks or % FRiP-hc as percentage (as indicated), orange = TAL1 peaks or FRiP as percentage (as indicated), brown = TAL1 overlapped-hc peaks or % FRiP-hc as percentage (as indicated). Blue, green, orange, and brown horizontal lines represent the mean in each category, as appropriate. Gray dotted lines indicate the commonly used 1% threshold for FRiP.
