# Supplementary material
Source: publisher figshare collection journal article supplement (https://gsajournals.figshare.com/articles/dataset/_/14237849)
Supplement: Supplementary file 5 [file 1]

**File S1: Description of supplemental material.** This document contains detailed descriptions for all the supplemental files and tables for:

### **Effects of sheared chromatin length on ChIP-seq quality and sensitivity**

Cheryl A. Keller, Alexander Q. Wixom, Elisabeth F. Heuston, Belinda Giardine, Chris C.-S. Hsiung, Maria R. Long, Amber Miller, Stacie M. Anderson, April Cockburn, Gerd A. Blobel, David M. Bodine, Ross C. Hardison

**File S2: Code.** This file contains a combination of custom bash scripts and commands to run FIMO, bedtools, and deepTools used to extract, quantitate, and visualize peak data with and without CTCF or TAL1 motifs.

**Table S1: Datasets.** This table contains a complete listing of datasets and metadata for all ChIP-seq samples, and includes the following information:

|           |                                                                                                                                 |
|-----------|---------------------------------------------------------------------------------------------------------------------------------|
| Column A: | Dataset category – classification of the dataset (main, retrospective, low input, or hematopoietic progenitor)                  |
| Column B: | Figures – list of figures in which the dataset appears                                                                          |
| Column C: | Target – ChIP-seq target (CTCF, TAL1, or POL2)                                                                                  |
| Column D: | Cell type – name of cell type used for ChIP-seq experiment                                                                      |
| Column E: | Library ID – unique dataset identifier                                                                                          |
| Column F: | Cell number – number of cells used for ChIP-seq experiment                                                                      |
| Column G: | Treatment – cell treatment prior to ChIP                                                                                        |
| Column H: | Fixative – fixative used to cross-link the cells before sonication                                                              |
| Column I: | Cycles – number of sonication cycles                                                                                            |
| Column J: | Average size (bp) - mean size of unenriched chromatin as measured between 100-500bp using the Agilent Bioanalyzer 7500 DNA chip |
| Column K: | Platform – Illumina sequencing platform                                                                                         |
| Column L: | Assembly – genome assembly to which the dataset was mapped                                                                      |
| Column M: | GEO – relevant GEO accession numbers                                                                                            |
| Column N: | Mapped Reads – numbers of mapped reads                                                                                          |
| Column O: | Peaks – number of peaks called by MACS                                                                                          |
| Column P: | Percent GC – percentage of CG content                                                                                           |
| Column Q: | Duplication rate – percentage of duplicated reads                                                                               |
| Column R: | Complexity – fraction of non-redundant reads                                                                                    |
| Column S: | Percent mapped – percentage of reads mapped to genome                                                                           |
| Column T: | NSC - normalized strand coefficient quality metric score                                                                        |
| Column U: | RSC - reverse strand coefficient quality metric score                                                                           |
| Column V: | QTag - Quality tag score based on thresholded RSC                                                                               |
| Column W: | FRiP – Fraction of Reads in Peaks score                                                                                         |
| Column X: | FRiP – Fraction of Reads in Peaks (as percentage)                                                                               |
| Column Y: | Subjective quality assessment (pass, low pass, or fail)                                                                         |

**Table S2: Peaks and motifs statistics.** This table contains statistics related to numbers of peaks and motifs.

|           |                                                                                                                                             |
|-----------|---------------------------------------------------------------------------------------------------------------------------------------------|
| Column A: | Dataset category – classification of the dataset (main)                                                                                     |
| Column B: | Figures – list of figures in which the dataset appears                                                                                      |
| Column C: | Target – ChIP-seq target (CTCF or TAL1)                                                                                                     |
| Column D: | Cell number – number of cells used for ChIP-seq experiment                                                                                  |
| Column E: | Library ID – unique dataset identifier                                                                                                      |
| Column F: | Cycles – number of sonication cycles                                                                                                        |
| Column G: | Peaks – number of peaks called by MACS                                                                                                      |
| Column H: | Peaks with motif ( $p < 0.0001$ ) – number of peaks with a significant motif ( $p < 0.0001$ )                                               |
| Column I: | Peaks without motif – number of peaks without a motif                                                                                       |
| Column J: | Percentage of peaks with motif ( $p < 0.0001$ ) – percentage of peaks with a significant motif ( $p < 0.0001$ )                             |
| Column K: | Overlapped-hc peaks – number of peaks that overlapped with high confidence peaks                                                            |
| Column L: | Percentage of peaks that overlapped with hc peaks – percentage of peaks that overlapped with high confidence peaks                          |
| Column M: | Overlapped-hc peaks motif ( $p < 0.0001$ ) – number of overlapped-hc peaks with a significant motif ( $p < 0.0001$ )                        |
| Column N: | Overlapped-hc peaks without motif – number of overlapped-hc peaks without a motif ( $p < 0.0001$ )                                          |
| Column O: | Percentage of overlapped-hc peaks with motif ( $p < 0.0001$ ) – percentage of overlapped-hc peaks with a significant motif ( $p < 0.0001$ ) |

**Table S3: Input datasets.** This table contains a complete listing of datasets and metadata for all input samples, and includes the following information:

|           |                                                                    |
|-----------|--------------------------------------------------------------------|
| Column A: | Dataset category – classification of the dataset (input)           |
| Column B: | Cell type – name of cell type used for ChIP-seq experiment         |
| Column C: | Library ID – unique dataset identifier                             |
| Column D: | Treatment – cell treatment                                         |
| Column E: | Fixative – fixative used to cross-link the cells before sonication |
| Column C: | Unique library ID                                                  |
| Column D: | Treatment                                                          |
| Column E: | Fixative used to cross-link the cells before sonication            |
| Column F: | Platform – Illumina sequencing platform                            |
| Column G: | Assembly – genome assembly to which the dataset was mapped         |
| Column H: | GEO – relevant GEO accession numbers                               |
| Column I: | Mapped Reads – numbers of mapped reads                             |
| Column J: | Percent GC – percentage of CG content                              |
| Column K: | Duplication rate – percentage of duplicated reads                  |
| Column L: | Percent mapped – percentage of reads mapped to genome              |

Column M: Used for Library IDs - list of unique library IDs for which the input data was used.  
Column N: Comments not covered by above categories

**Table S4: Hematopoietic progenitors.** This table contains information related to the isolation of mouse eight primary hematopoietic progenitor cells from mouse bone marrow.

Column A: Cell type – name of cell type used for ChIP-seq experiment  
Column B: Library ID – unique dataset identifier  
Column C: Isolation/sort markers – list of markers used for isolation and sorting of cell types via FACS  
Columns D-AG: Isolation dates and cell numbers (in millions of cells) for each cell type, as indicated by row  
Column AH: Totals – total cell numbers (in millions) isolated for each cell type  
Column AI: Comments not covered by above categories
